# Supplementary material
Source: PubMed Central journal article supplement (PMC357000)
Supplement: pnas_0304471101_8.pdf [file pnas_0304471101_8.pdf]

**A**

Anti-TRPC3

IP      supernatant

A Western blot analysis showing the results of an immunoprecipitation (IP) experiment. The blot is probed with Anti-TRPC3 antibodies. There are two lanes: 'IP' and 'supernatant'. The 'IP' lane shows a dark band, indicating a high concentration of TRPC3 protein. The 'supernatant' lane shows a much lighter band, indicating that most of the TRPC3 protein was successfully precipitated during the IP process.

**B**

kDa

TRPC3

177

114

81

64

IP      supernatant      IP+KT5823      IP+AP

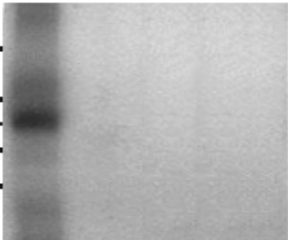A Western blot analysis of TRPC3 protein levels. On the left, molecular weight markers are indicated in kilodaltons (kDa): 177, 114, 81, and 64. The TRPC3 protein band is located between the 81 and 114 kDa markers. The blot contains four lanes: 'IP', 'supernatant', 'IP+KT5823', and 'IP+AP'. The 'IP' lane shows a strong TRPC3 band. The 'supernatant' lane shows a very faint band. The 'IP+KT5823' and 'IP+AP' lanes show significantly reduced TRPC3 levels compared to the 'IP' lane, suggesting that these treatments interfere with the TRPC3 protein or its detection.
