# Supplementary material
Source: PubMed Central journal article supplement (PMC357000)

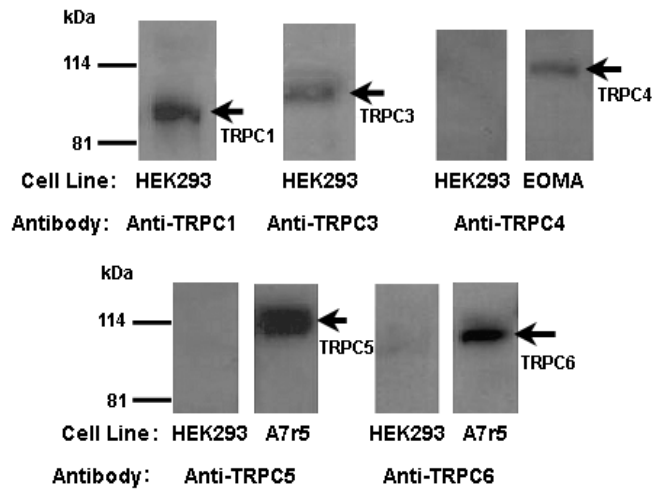

Supplement: pnas_0304471101_2.pdf [file pnas_0304471101_2.pdf]

**A**

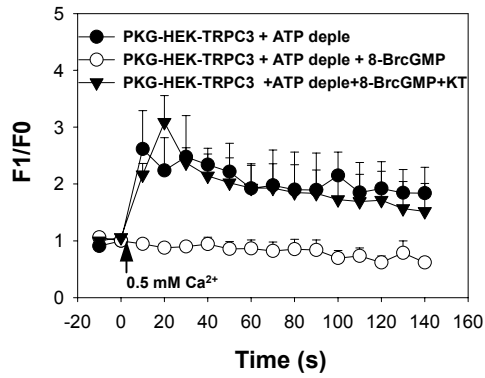

**B**

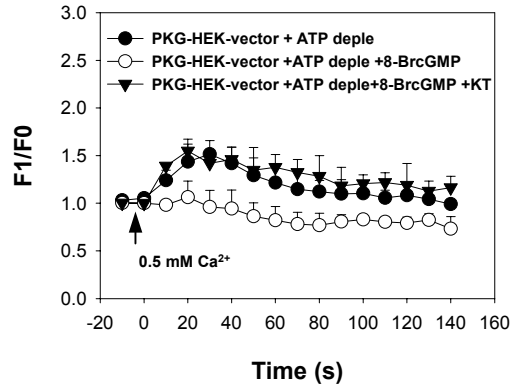

**C**

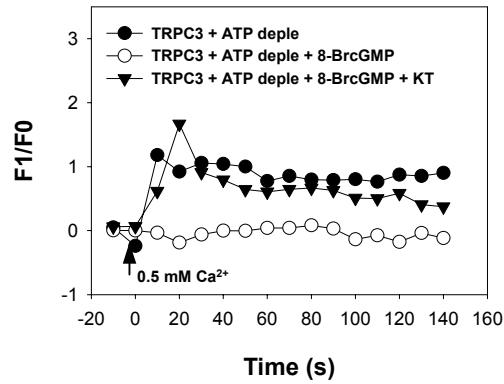

Supplement: pnas_0304471101_4.pdf [file pnas_0304471101_4.pdf]

**A**

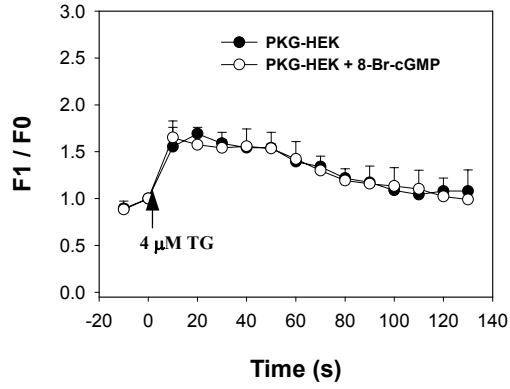

**B**

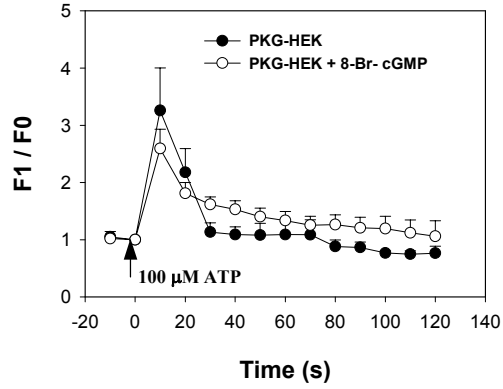

Supplement: pnas_0304471101_6.pdf [file pnas_0304471101_6.pdf]
